# Supplementary material
Source: MDPI journal article supplement (https://www.mdpi.com/2311-7524/9/10/1111)
Supplement: s1 [file s1 › horticulturae-2628052-supplementary.pdf]

## Supplementary Data

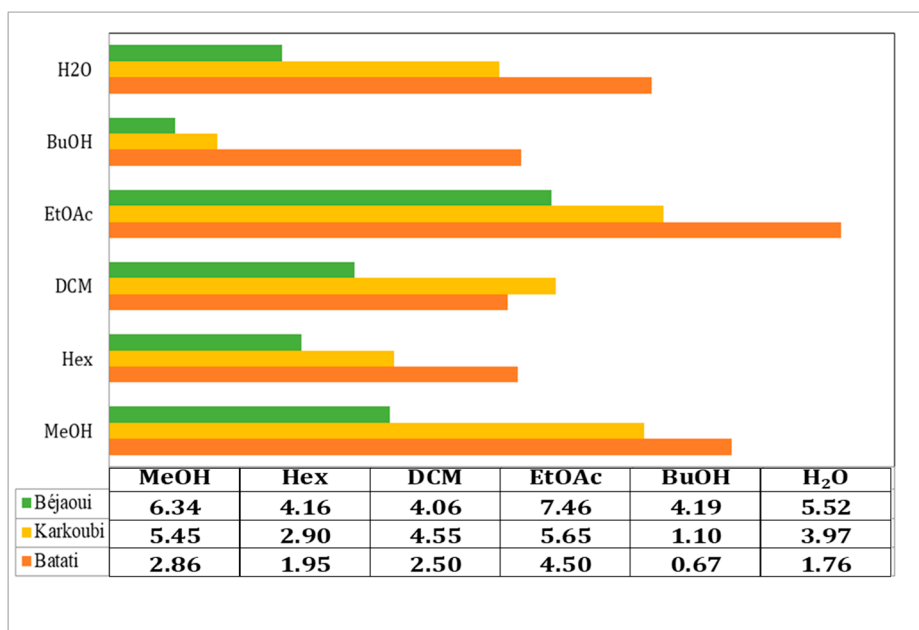

**Figure S1.** Total polyphenol content (TPC expressed as mg GAE/ g extract) extracted using linear gradient solvent of crude Batati, Karkoubi, and Bejaoui peel extracts. MeOH: Methanol fraction; Hex: Hexane fraction; DCH: Dichloromethane fraction; EtOAc: Ethyl Acetate fraction; BuOH: Butanol fraction; and H<sub>2</sub>O: aqueous fraction.

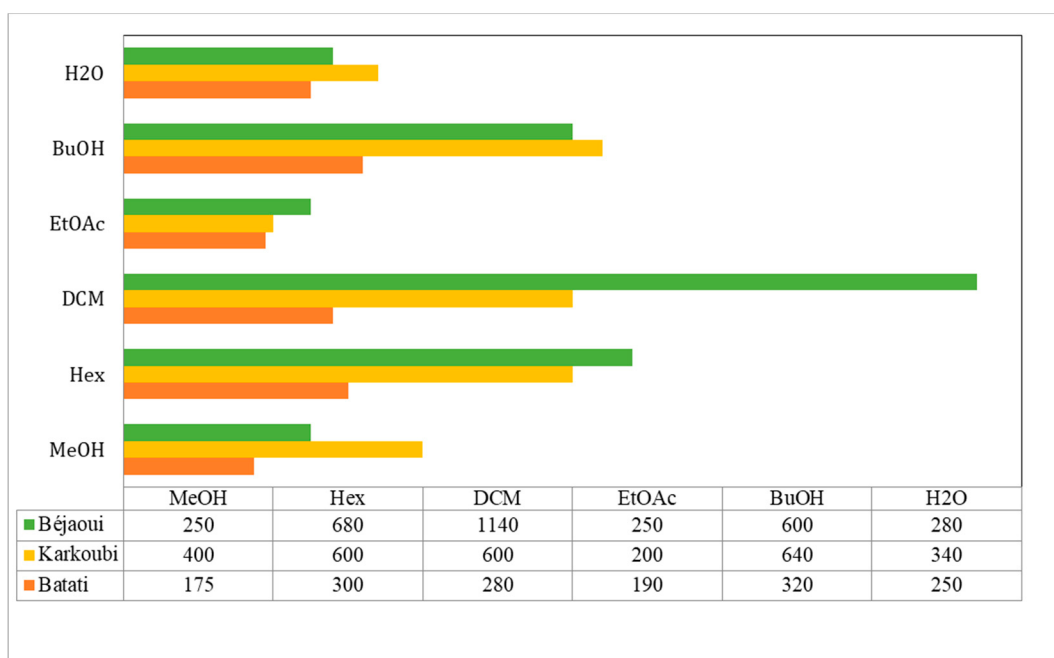

**Figure S2.** Antiradical activity, expressed as inhibition concentration at 50% ( $IC_{50}$ ) in the fractions obtained from Batati, Karkoubi, and Bejaoui peel extracts. MeOH: Methanol fraction; Hex: Hexane fraction; DCH: Dichloromethane fraction; EtOAc: Ethyl Acetate fraction; BuOH: Butanol fraction; and H<sub>2</sub>O: aqueous fraction.
